# Supplementary material
Source: PubMed Central journal article supplement (PMC3929677)

## Supplemental Figures and Legends

**FIGURE S1. Levels of mitochondrial genes in skeletal muscle of TWEAK-Tg and TWEAK-KO mice 10d post-denervation.** 3 months old wild-type, TWEAK-Tg, and TWEAK-KO mice were denervated for 10d and mRNA levels of mitochondria-related genes were measured by performing QRT-PCR. **(A)** Relative mRNA levels Cyt c, CoxI, and Tfam in undenervated and 10d denervated TA muscle of wild-type and TWEAK-KO mice. **(B)** Relative mRNA levels Cyt c in undenervated and 10d denervated TA muscle of wild-type and TWEAK Tg mice. Error bars represent SD. N=3 in each group. \* $p < 0.01$ , values significantly different from contralateral undenervated muscle. # $p < 0.05$ , values significantly different from denervated muscle of wild type mice. WT, wild type.

**FIGURE S2. PGC-1 $\alpha$  protein levels in skeletal muscle of wild-type and PGC-1 $\alpha$  Tg mice.** Western blot analysis of PGC-1 $\alpha$  and an unrelated protein tubulin in soleus (Sol) and extensor digitorum longus (EDL) muscle of wild-type and PGC-1 $\alpha$  Tg mice.

**FIGURE S1**

**A.**

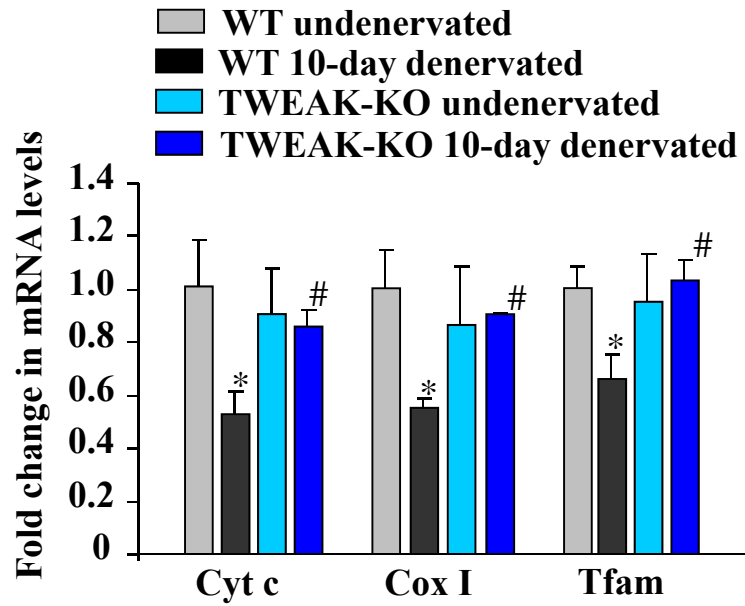

**B.**

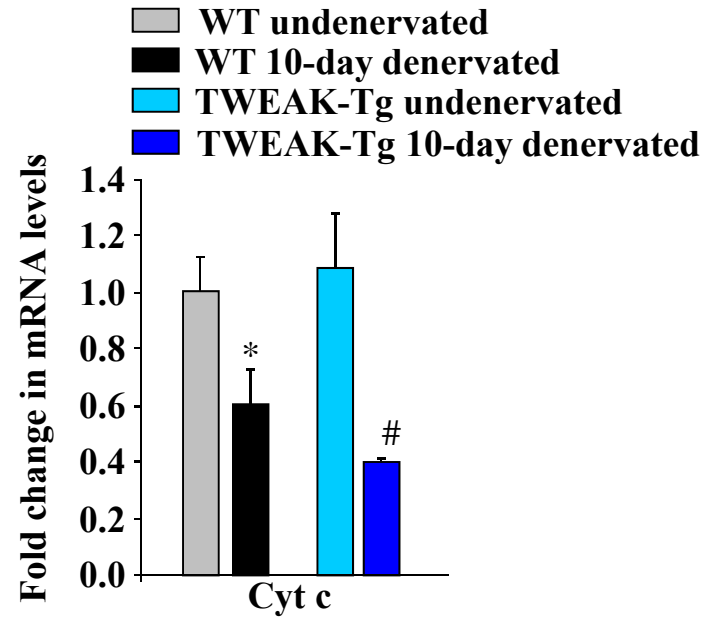

**FIGURE S2**

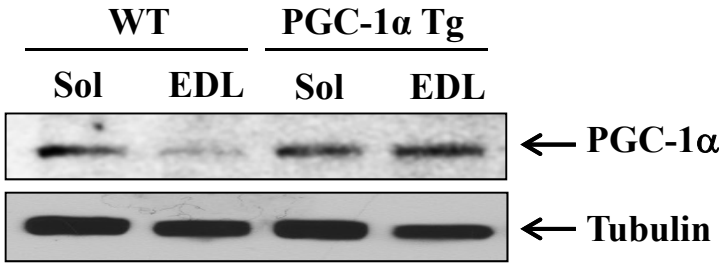

Supplement: supp_fj.13-242123_13-242123SuppData.pdf [file supp_fj.13-242123_13-242123SuppData.pdf]
